# Supplementary material for: A New Megastigmane Glucoside and Other Constituents from Desmodium gangeticum
Source: Hindawi journal article supplement (doi:10.1155/2020/7416973), 2020-11-04
Supplement: f1 [file 7416973.f1.docx]

A new megastigmane glucoside and other constituents from *Desmodium gangeticum*

Hau Dang Viet1, Giang Do Hoang1, Phuong Ngo Thi2, Dat Nguyen Tien1*, Ha Le Minh2*

1Center for Research and Technology Transfer, Vietnam Academy of Science and Technology (VAST), 18-Hoang Quoc Viet, Cau Giay, Hanoi, Vietnam

2Institute of Natural Product Chemistry, VAST, 18-Hoang Quoc Viet, Cau Giay, Hanoi, Vietnam;

*Correspondence: [halm2vn@gmail.com](mailto:halm2vn@gmail.com), [ngtiend@imbc.vast.vn](mailto:ngtiend@imbc.vast.vn)

Figure S1: HR-ESI-MS spectrum of **1**

Figure S2: 1H NMR spectrum of **1**

Figure S3: 13C NMR spectrum of **1**

Figure S4: HSQC spectrum of **1**

Figure S5: HMBC spectrum of **1**
Figure S6: NOESY spectrum of **1**


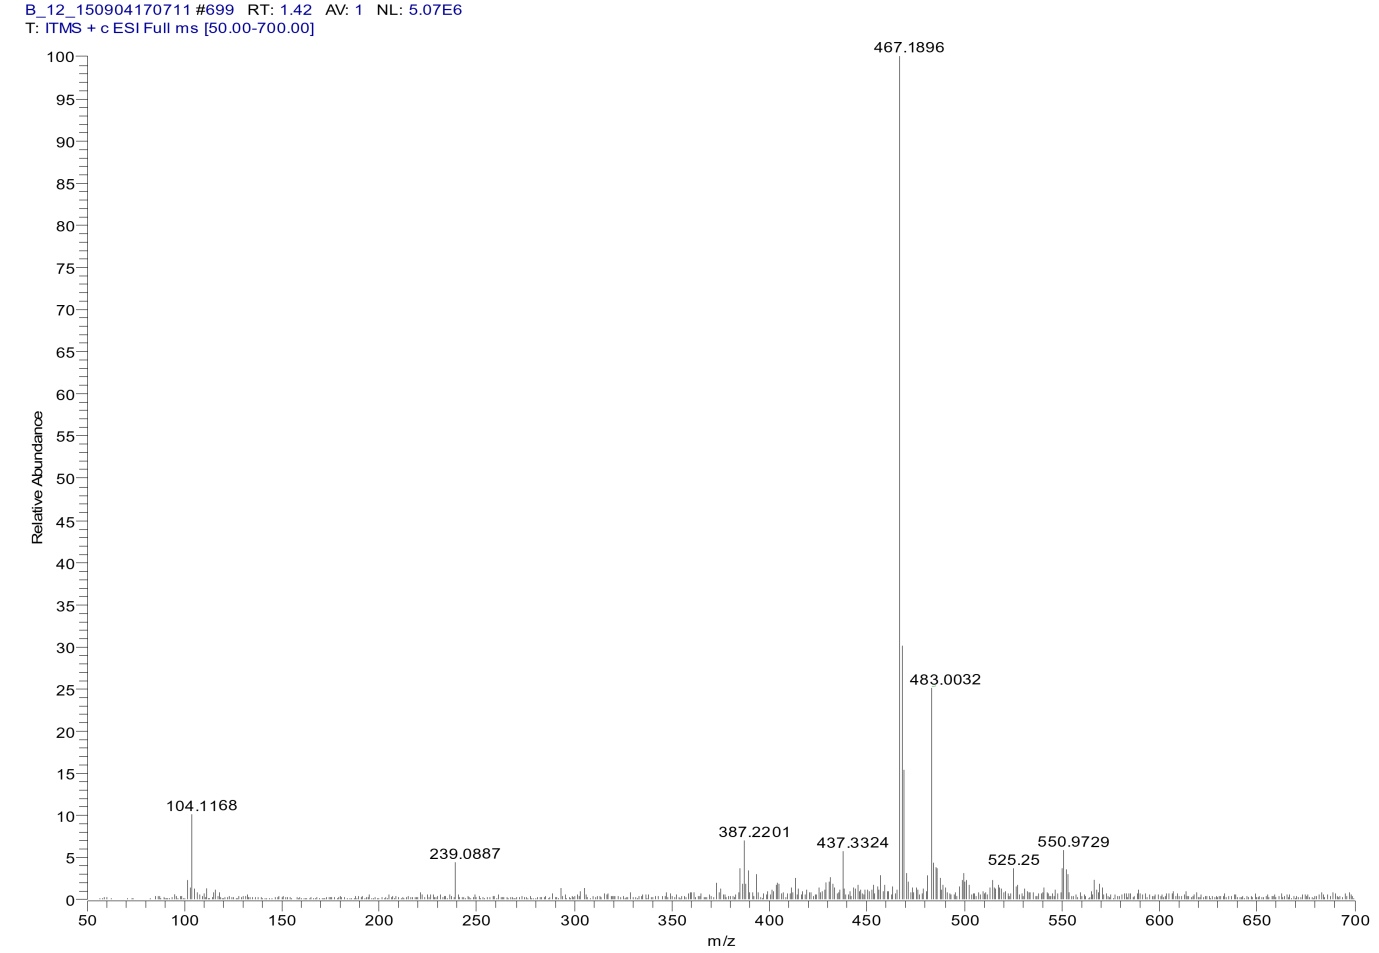


Figure S1: HR-ESI-MS spectrum of **1**


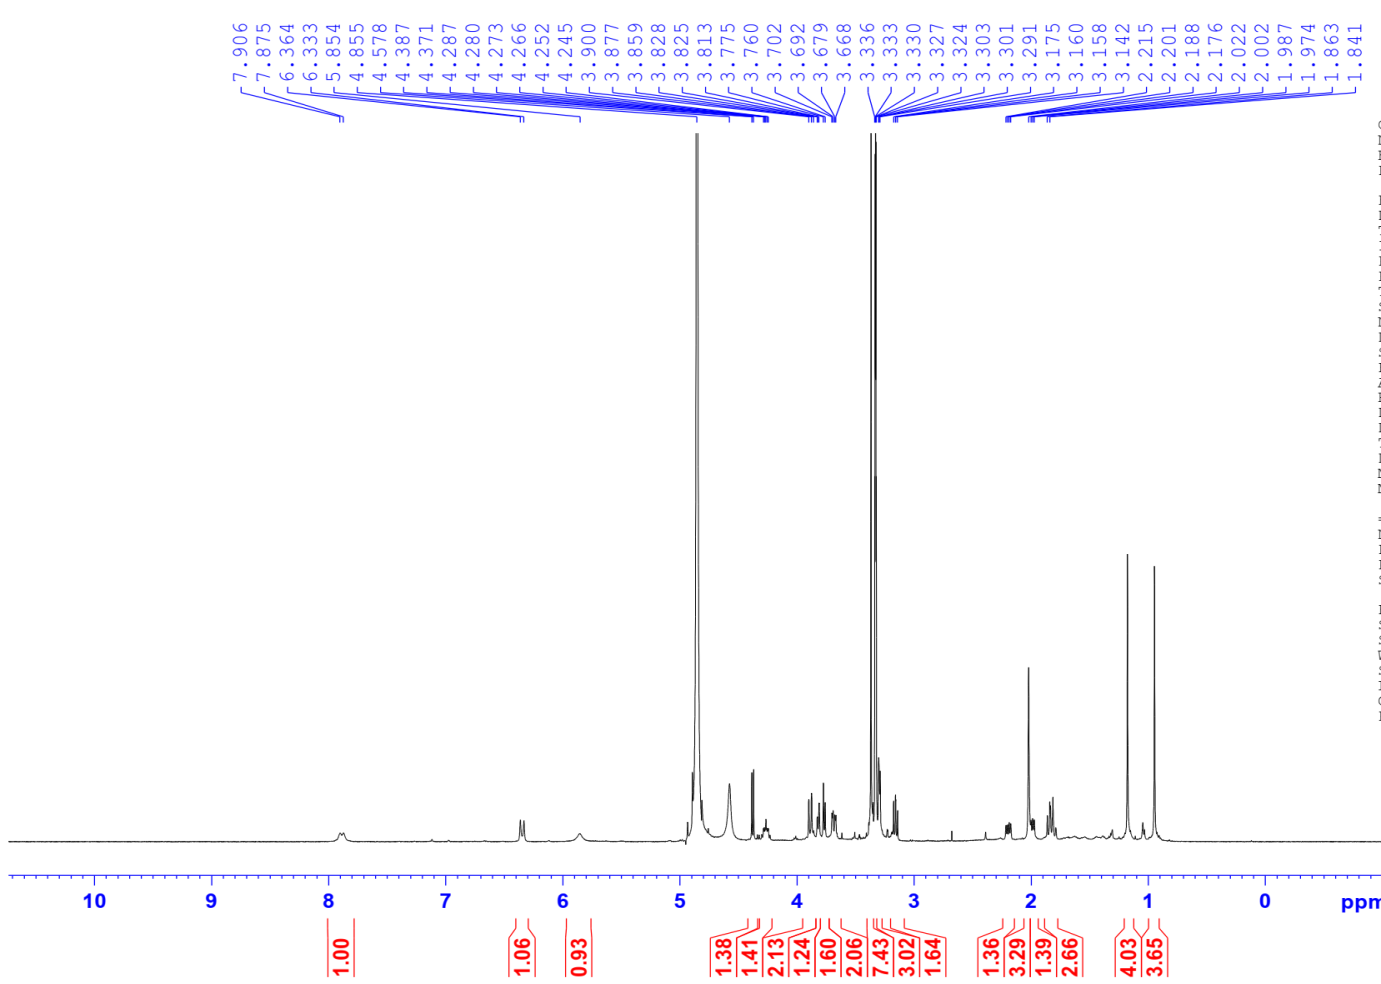


Figure S2: 1H NMR spectrum of **1**


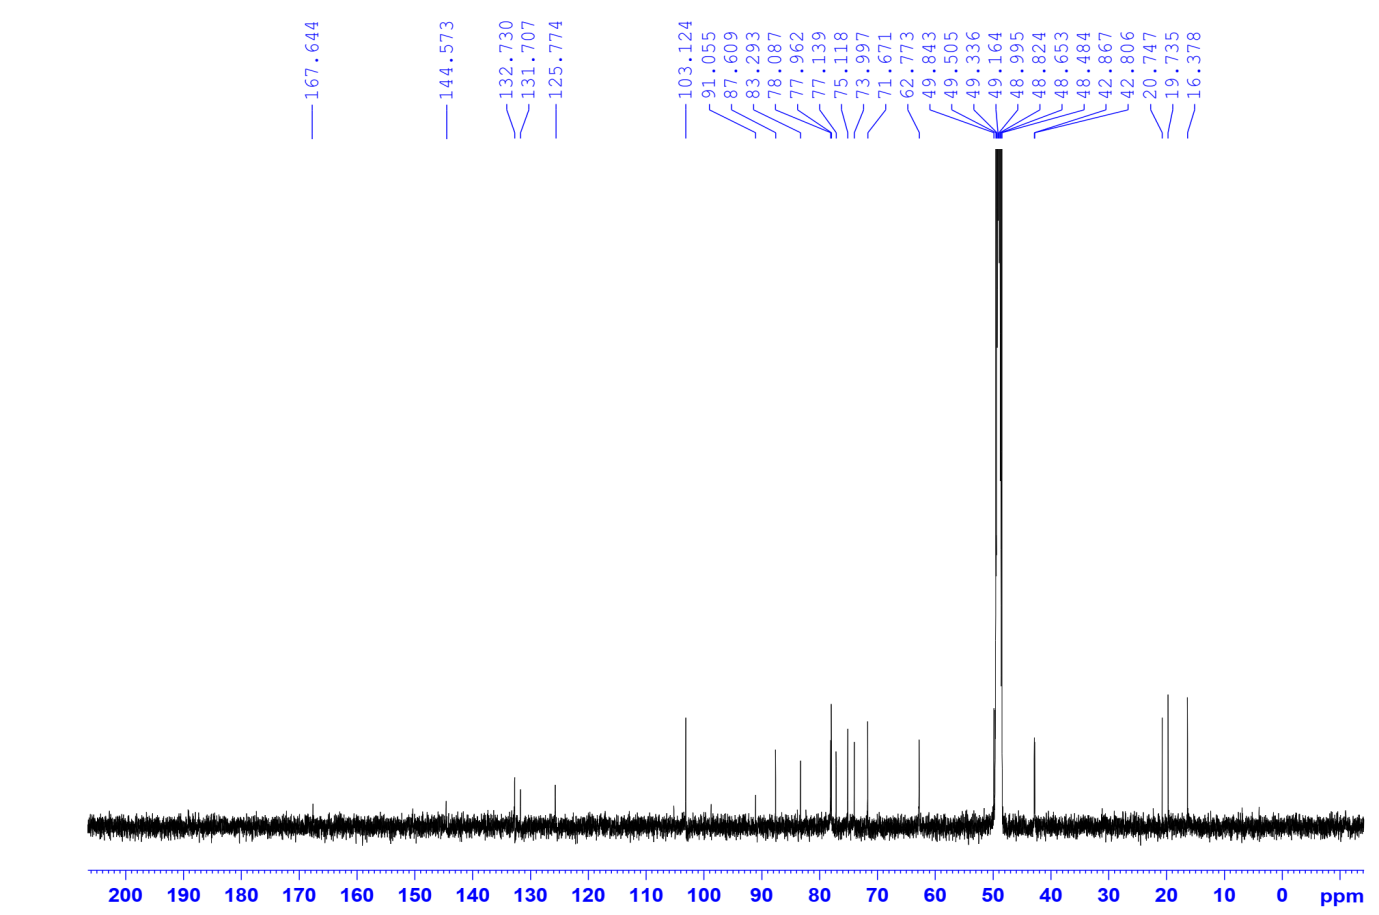


Figure S3: 13C NMR spectrum of **1**


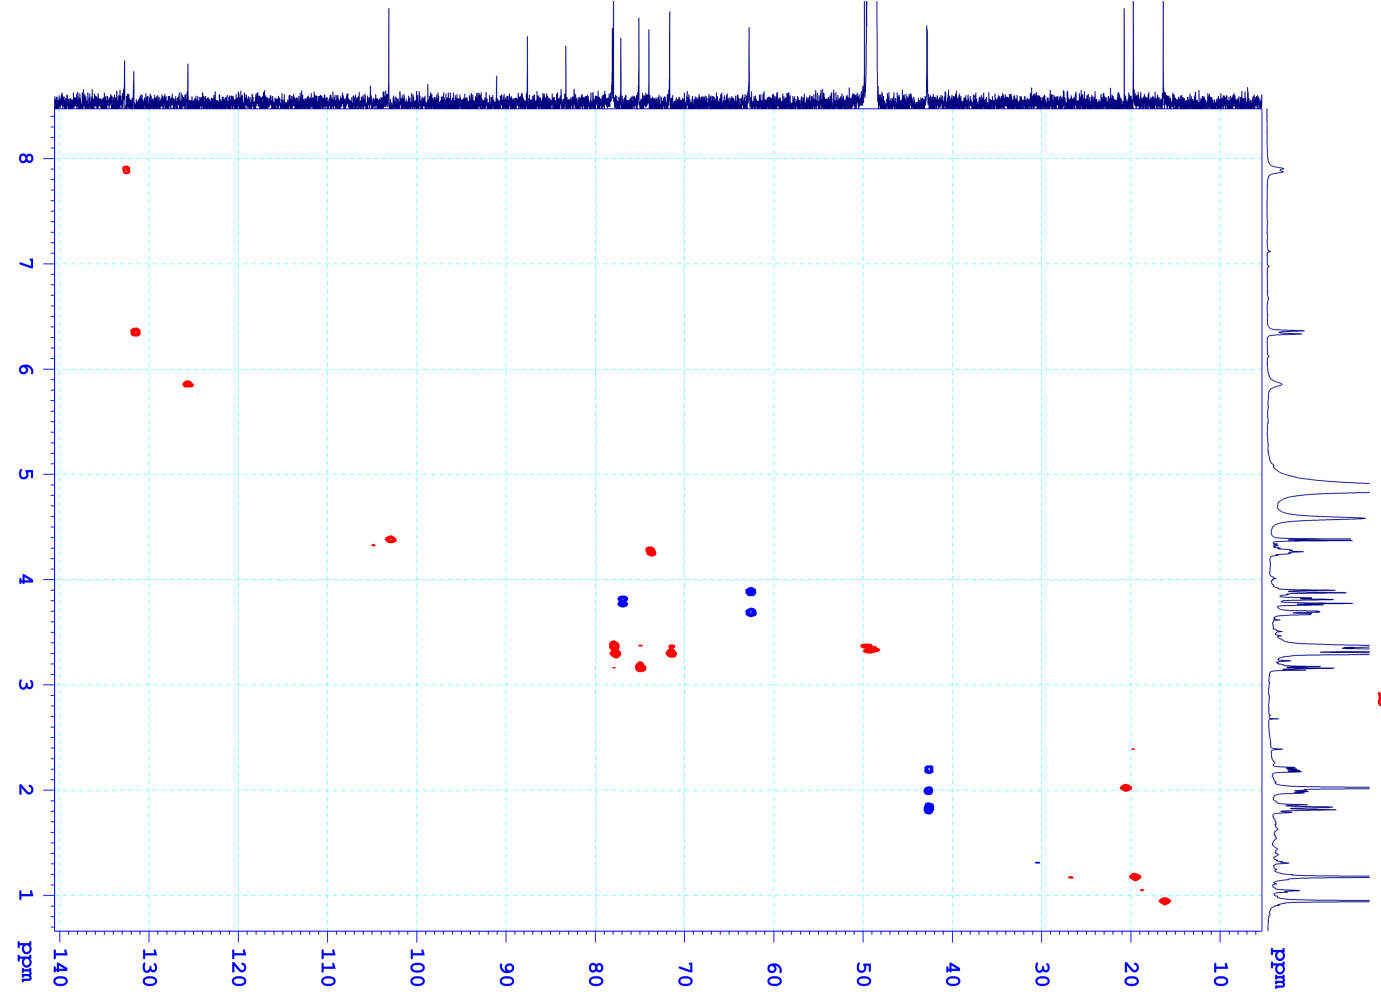


Figure S4: HSQC spectrum of **1**
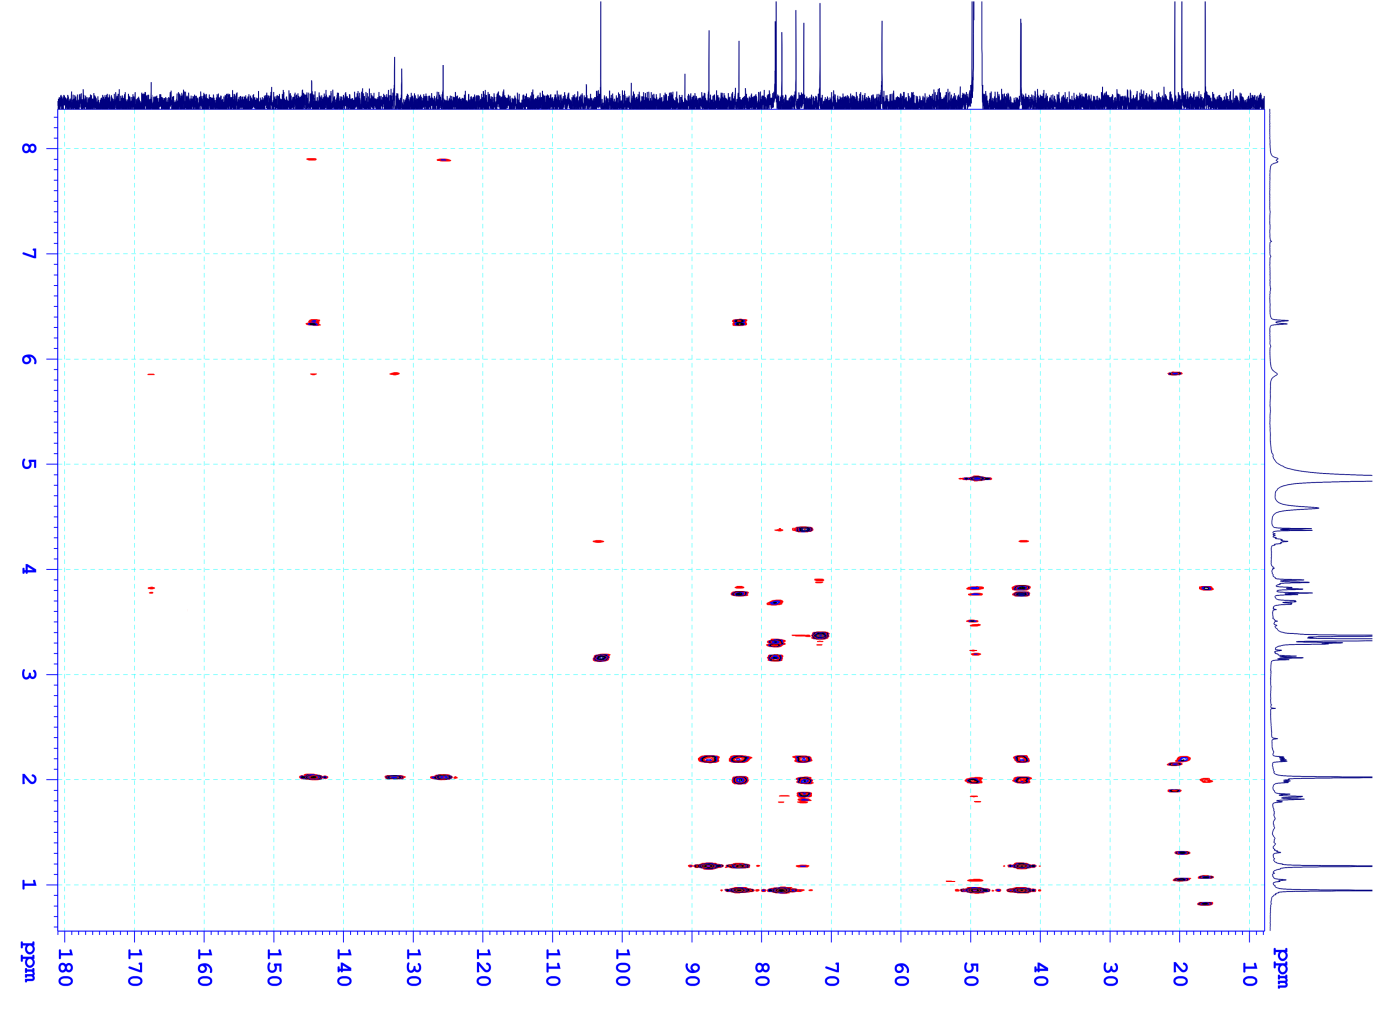


Figure S5: HMBC spectrum of **1**


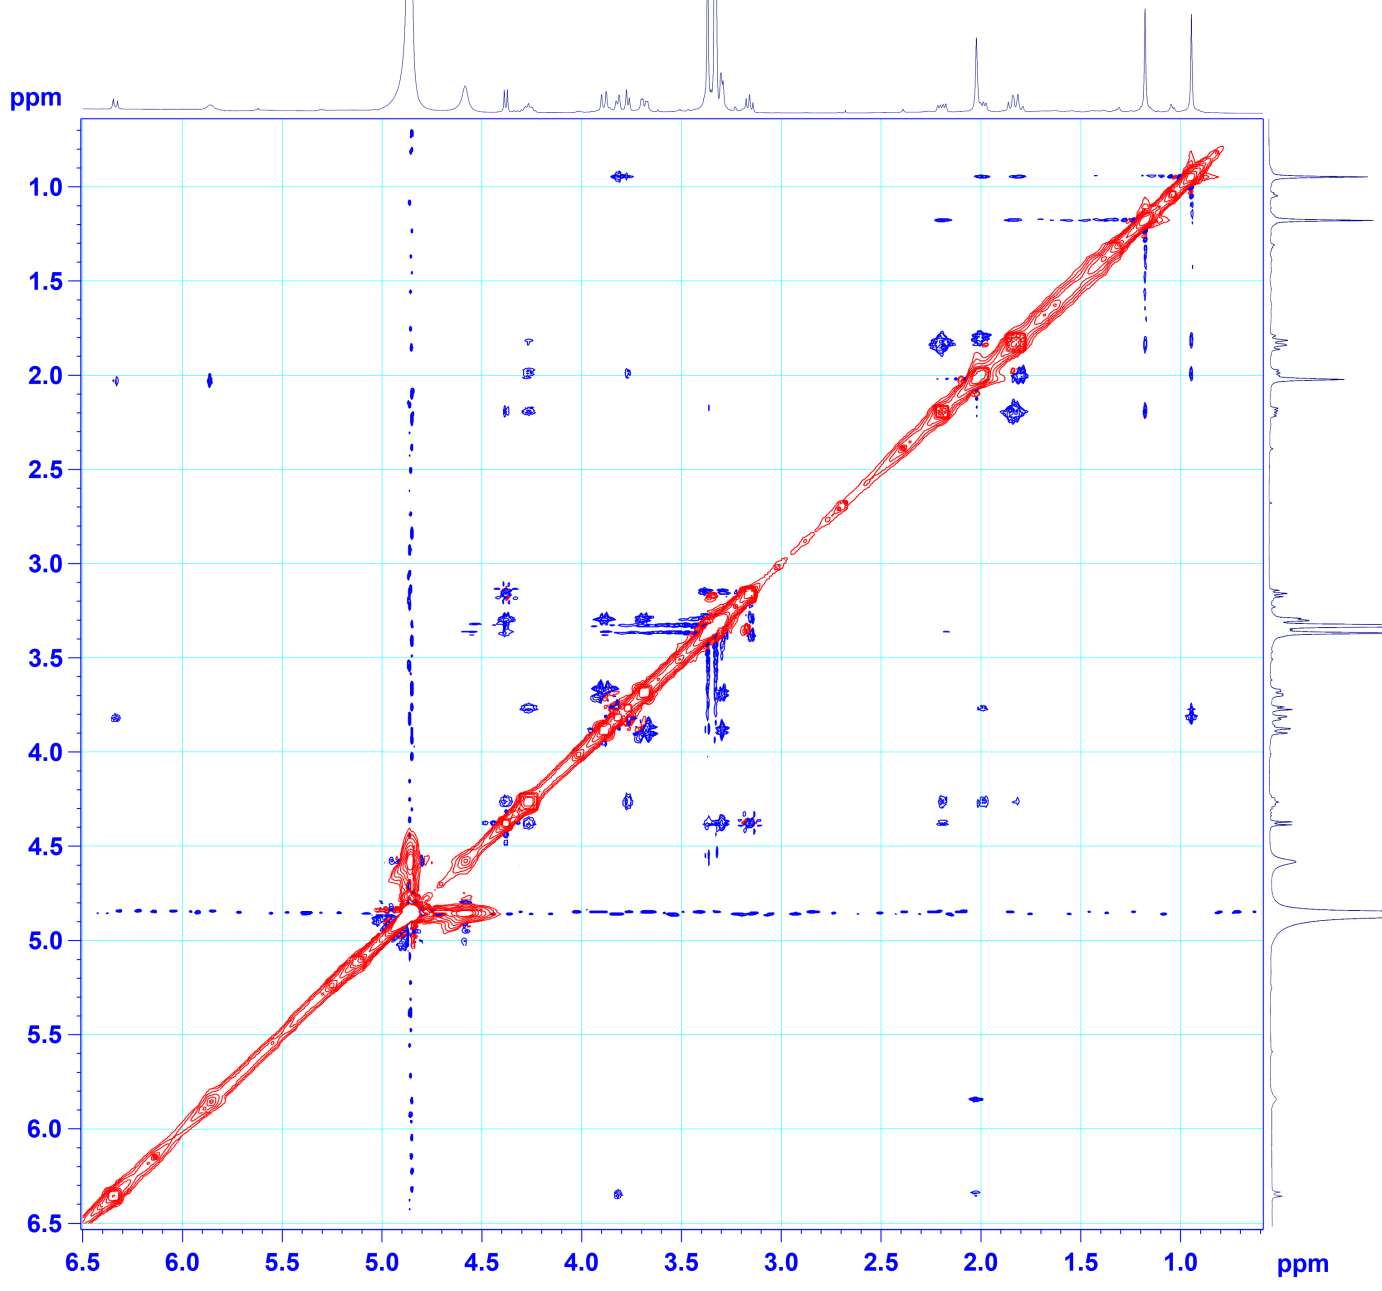


Figure S6: NOESY spectrum of **1**
